# Supplementary material for: Hydrangea serrata (Thunb.) Ser. Extract Attenuate UVB-Induced Photoaging through MAPK/AP-1 Inactivation in Human Skin Fibroblasts and Hairless Mice
Source: PubMed Central journal article supplement (PMC6470489; doi:10.3390/nu11030533), 2019-03-01
Supplement: nutrients-11-00533-s001.pdf [file nutrients-11-00533-s001.pdf]

**Table S1.** The primer sequence for qRT-PCR

| <b>Gene</b>                      |         | <b>Sequence</b>                 |
|----------------------------------|---------|---------------------------------|
| <b>hMMP-1</b>                    | forward | 5'-GCCCAGGTATTGGAGGGGAT-3'      |
|                                  | reverse | 5'-AGGGTACATCAAAGCCCCGA-3'      |
| <b>hMMP-3</b>                    | forward | 5'-TTCAGCTATTTGCTTGGGAAA-3'     |
|                                  | reverse | 5'-CAAAACATATTTCTTTGTAGAGG-3'   |
| <b>hTNF-<math>\alpha</math></b>  | forward | 5'-TCTCTCTAATCAGCCCTCTG-3'      |
|                                  | reverse | 5'-CAGATAGATGGGCTCATAACC-3'     |
| <b>hIL-1<math>\beta</math></b>   | forward | 5'-AAGTACCTGAGCTCGCCAGT-3'      |
|                                  | reverse | 5'-AGTGGTGGTCGGAGATTCGT-3'      |
| <b>hIL-6</b>                     | forward | 5'-CCCCAGGAGAAGATTCCAAA-3'      |
|                                  | reverse | 5'-TTGTTTTCTGCCAGTGCCTC-3'      |
| <b>hIL-8</b>                     | forward | 5'-CAAACCTTTCCACCCCAAAT-3'      |
|                                  | reverse | 5'-ACCCTCTGCACCCAGTTTTTC-3'     |
| <b>hGAPDH</b>                    | forward | 5'-ATCAAGTGGGGCGATGCTG-3'       |
|                                  | reverse | 5'-ACCCATGACGAACATGGGG-3'       |
| <b>mIL-1<math>\beta</math></b>   | forward | 5'-ACCTGCTGGTGTGTGACGTT-3'      |
|                                  | reverse | 5'-TCGTTGCTTGGTTCTCCTTG-3'      |
| <b>mIL-6</b>                     | forward | 5'-GAGGATAACCACTCCCAACAGACC-3'  |
|                                  | reverse | 5'-AAGTGCATCATCGTTGTTTCATACA-3' |
| <b>m<math>\beta</math>-actin</b> | forward | 5'-ATCACTATTGGCAACGAGCG-3'      |
|                                  | reverse | 5'-TCAGCAATGCCTGGGTACAT-3'      |
| <b>hCOL1A1</b>                   | forward | 5'-AGGGCCAAGACGAAGACATC-3'      |
|                                  | reverse | 5'-AGATCACGTCATCGCACAACA-3'     |

**Table S2.** The catalog numbers and sources of antibodies for Western blot analysis.

| <b>Protein</b> | <b>Catalog No.</b> | <b>Source</b>             |
|----------------|--------------------|---------------------------|
| p-c-fos        | 5348S              |                           |
| p-STAT1 (S727) | 8826S              | Cell Signaling Technology |
| p-p38          | 9215L              |                           |
| Histone H3     | 9715               |                           |
| c-fos          | sc-253             |                           |
| p-c-jun        | sc-822             |                           |
| c-jun          | sc-74543           |                           |
| STAT1          | sc-592             |                           |
| p38            | sc-271120          | Santa Cruz Biotechnology  |
| p-JNK          | sc-6254            |                           |
| JNK            | sc-7345            |                           |
| p-ERK          | sc-7383            |                           |
| ERK            | sc-94              |                           |
| $\beta$ -actin | sc-81178           |                           |
| MMP-1          | 634701             | Biolegend                 |
| MMP-3          | 634901             |                           |

**Figure S1.**

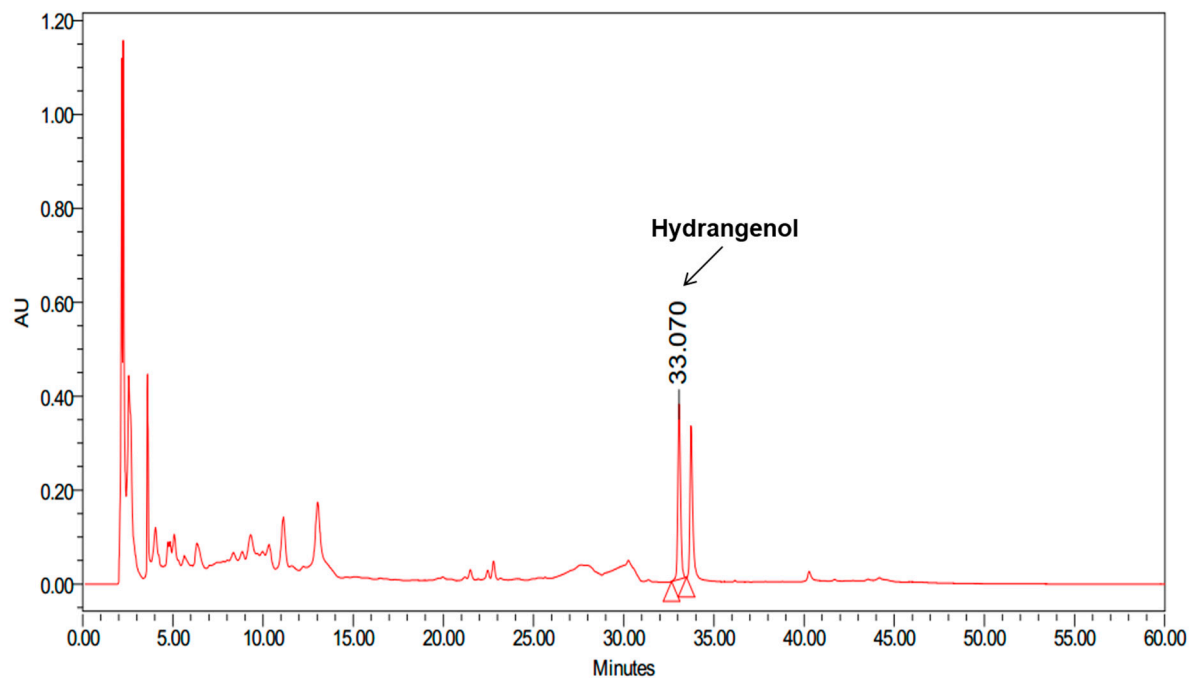

**Figure S1.** HPLC chromatogram of *Hydrangea serrata* (Thunb.) Ser (WHS).
